# Supplementary material for: Metal specificities of Arabidopsis zinc and copper transport proteins match the relative, but not the absolute, affinities of their N-terminal domains
Source: Royal Society of Chemistry journal article supplement (doi:10.1039/b916472c), 2009-01-01
Supplement: b916472c.pdf [file b916472c.pdf]

## **Metal Specificities of *Arabidopsis* Zinc and Copper Transport Proteins Match the Relative, But Not the Absolute, Affinities of their N-Terminal Domains**

Matthias Zimmermann,<sup>†</sup> Zhiguang Xiao,<sup>†</sup> Christopher S. Cobbett<sup>#</sup> and Anthony G. Wedd<sup>†,\*</sup>

<sup>†</sup> School of Chemistry and Bio21 Molecular Science and Biotechnology Institute, <sup>#</sup>Department of Genetics, University of Melbourne, Parkville, Victoria 3010, Australia.

Email: [agw@unimelb.edu.au](mailto:agw@unimelb.edu.au);

**Electronic Supplementary Information**

**Table S1 ESI-MS Data of Isolated Proteins**

| <b>Protein</b> | <b>Molar Mass (Da)</b> |                   |
|----------------|------------------------|-------------------|
|                | <b>Calculated</b>      | <b>Found</b>      |
| HMA4n (2-96)   | 10730                  | 10730             |
| HMA7n (56-127) | 8001 <sup>a</sup>      | 7999 <sup>b</sup> |

<sup>a</sup> including extra residues of N-term Met and C-term Trp;

<sup>b</sup> consistent with formation of an intra-molecular disulfide bond.

**Table S2. Estimation of  $K_{\text{ex}3}$  for the competition reaction 3 <sup>a</sup>**

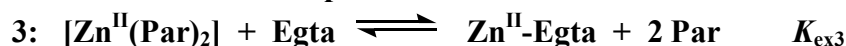

| Egta           | [Par] <sub>total</sub><br>( $\mu\text{M}$ ) | [Zn] <sub>total</sub><br>( $\mu\text{M}$ ) | [Egta] <sub>total</sub><br>( $\mu\text{M}$ ) | $A_{500}$ | [Zn(Par) <sub>2</sub> ]<br>( $\mu\text{M}$ ) | $\Theta^b$ | $K_{\text{ex}3}^c$<br>( $\times 10^{-4}$ ) |
|----------------|---------------------------------------------|--------------------------------------------|----------------------------------------------|-----------|----------------------------------------------|------------|--------------------------------------------|
|                | 50.0                                        | 10.2                                       | 0.00                                         | 0.820     | 10.2                                         |            |                                            |
|                | 49.3                                        | 10.1                                       | 7.39                                         | 0.447     | 5.58                                         | 0.61       | 4.1                                        |
|                | 49.0                                        | 10.0                                       | 9.80                                         | 0.345     | 4.32                                         | 0.58       | 5.3                                        |
|                | 48.8                                        | 9.99                                       | 12.2                                         | 0.269     | 3.36                                         | 0.54       | 6.3                                        |
|                | 48.5                                        | 9.95                                       | 14.6                                         | 0.213     | 2.66                                         | 0.50       | 7.0                                        |
|                | 48.3                                        | 9.90                                       | 16.9                                         | 0.171     | 2.14                                         | 0.46       | 7.7                                        |
|                | 48.1                                        | 9.85                                       | 19.2                                         | 0.139     | 1.73                                         | 0.42       | 8.4                                        |
|                | 47.9                                        | 9.80                                       | 21.5                                         | 0.116     | 1.46                                         | 0.39       | 8.8                                        |
|                | 47.6                                        | 9.76                                       | 23.8                                         | 0.099     | 1.24                                         | 0.36       | 9.2                                        |
| <hr/>          |                                             |                                            |                                              |           |                                              |            |                                            |
|                | 100                                         | 10.3                                       | 0.00                                         | 0.822     | 10.3                                         |            |                                            |
|                | 98.5                                        | 10.1                                       | 7.39                                         | 0.562     | 7.02                                         | 0.42       | 7.4                                        |
|                | 98.0                                        | 10.1                                       | 9.80                                         | 0.480     | 5.99                                         | 0.42       | 8.8                                        |
|                | 97.6                                        | 10.0                                       | 12.2                                         | 0.415     | 5.19                                         | 0.40       | 9.6                                        |
|                | 97.1                                        | 9.98                                       | 14.6                                         | 0.362     | 4.52                                         | 0.37       | 10.3                                       |
|                | 96.6                                        | 9.93                                       | 16.9                                         | 0.319     | 3.99                                         | 0.35       | 10.7                                       |
|                | 96.2                                        | 9.88                                       | 19.2                                         | 0.284     | 3.55                                         | 0.33       | 11.0                                       |
|                | 95.7                                        | 9.84                                       | 21.5                                         | 0.253     | 3.16                                         | 0.31       | 11.4                                       |
|                | 95.2                                        | 9.79                                       | 23.8                                         | 0.228     | 2.85                                         | 0.29       | 11.6                                       |
|                | 94.8                                        | 9.74                                       | 26.1                                         | 0.207     | 2.58                                         | 0.27       | 11.8                                       |
|                | 94.3                                        | 9.70                                       | 28.3                                         | 0.189     | 2.36                                         | 0.26       | 11.9                                       |
| <b>average</b> |                                             |                                            |                                              |           |                                              |            | <b>8.9(2.3)<sup>c</sup></b>                |

<sup>a</sup> The experiments were carried out in Mops buffer (50 mM; pH 7.3; NaCl 100 mM) under anaerobic conditions. The reported values were confirmed with three independent protein samples;

<sup>b</sup> Zn occupancy on Egta;

<sup>c</sup> The observed  $K_{\text{ex}3}$  for reaction A depends on the Zn occupancy on Egta, suggestive of the possible involvement of tertiary complexes such as Par-Zn-Egta in the reaction. Therefore, the average  $K_{\text{ex}3}$  must be treated as an approximate indicator of the affinity of Par for  $\text{Zn}^{\text{II}}$  only. However, selection of this data has no influence on the relative difference of protein  $\text{Zn}^{\text{II}}$   $K_{\text{D}}$  obtained via competition with Par given in Table S3 where the observed  $K_{\text{ex}1}$  for reaction 1 does not depend on the Zn occupancy on the protein and thus is reliable.

**Table S3. Estimation of  $K_{\text{ex1}}$  for competition reaction 1 and of  $K_{\text{D(ZnP)}}$  from Eq 2<sup>a</sup>**

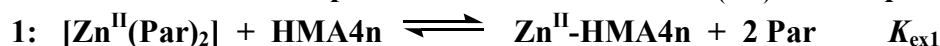

| Protein<br>(P) | [Par] <sub>total</sub><br>( $\mu\text{M}$ ) | [Zn] <sub>total</sub><br>( $\mu\text{M}$ ) | [P] <sub>total</sub><br>( $\mu\text{M}$ ) | $A_{500}$ | [Zn(Par) <sub>2</sub> ]<br>( $\mu\text{M}$ ) | $\Theta$ <sup>b</sup> | $K_{\text{ex1}}$<br>( $\times 10^{-3}$ ) | $K_{\text{D(ZnP)}}$ <sup>c</sup><br>( $10^{-10}$ M) |
|----------------|---------------------------------------------|--------------------------------------------|-------------------------------------------|-----------|----------------------------------------------|-----------------------|------------------------------------------|-----------------------------------------------------|
| HMA4n          | 100                                         | 9.33                                       | 0                                         | 0.747     | 9.33                                         |                       |                                          |                                                     |
|                | 99.5                                        | 9.28                                       | 1.84                                      | 0.619     | 7.74                                         | 0.84                  | 4.8                                      |                                                     |
|                | 99.0                                        | 9.24                                       | 3.66                                      | 0.515     | 6.43                                         | 0.77                  | 3.8                                      |                                                     |
|                | 98.5                                        | 9.19                                       | 5.47                                      | 0.436     | 5.45                                         | 0.68                  | 3.1                                      |                                                     |
|                | 98.0                                        | 9.15                                       | 7.25                                      | 0.348     | 4.34                                         | 0.66                  | 3.6                                      |                                                     |
|                | 97.6                                        | 9.10                                       | 9.02                                      | 0.267     | 3.34                                         | 0.64                  | 4.4                                      |                                                     |
|                | 97.1                                        | 9.06                                       | 10.8                                      | 0.203     | 2.54                                         | 0.60                  | 5.1                                      |                                                     |
|                | 96.6                                        | 9.01                                       | 12.5                                      | 0.156     | 1.95                                         | 0.56                  | 5.7                                      |                                                     |
| average        |                                             |                                            |                                           |           |                                              |                       | 4.3(1.2)                                 | <b>2.1(6)</b>                                       |

<sup>a</sup> The experiments were carried out in Mops buffer (50 mM; pH 7.3; NaCl 100 mM) under anaerobic conditions. The reported values were confirmed with three independent protein samples;

<sup>b</sup> Zn occupancy on Egta;

<sup>c</sup> From Eq 5 where  $K_{\text{D(Zn-Egta)}} = 1.0 \times 10^{-9}$  M and  $K_{\text{ex3}} \sim 8.9 \times 10^{-4}$  (see Table S2) at pH 7.3, NaCl 100 mM.

**Table S4. . Estimation of  $K_{\text{ex1}}$  for competition reaction 1 and of  $K_{\text{D}(\text{ZnP})}$  from Eq 2<sup>a</sup>**

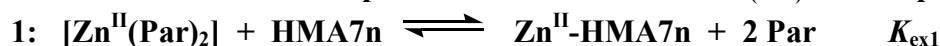

| Protein<br>(P) | [Par] <sub>total</sub><br>( $\mu\text{M}$ ) | [Zn] <sub>total</sub><br>( $\mu\text{M}$ ) | [P] <sub>total</sub><br>( $\mu\text{M}$ ) | $A_{500}$ | [Zn(Par) <sub>2</sub> ]<br>( $\mu\text{M}$ ) | $\Theta$ <sup>b</sup> | $K_{\text{ex1}}$<br>( $\times 10^{-4}$ ) | $K_{\text{D}(\text{ZnP})}$ <sup>c</sup><br>( $10^{-9}$ M) |
|----------------|---------------------------------------------|--------------------------------------------|-------------------------------------------|-----------|----------------------------------------------|-----------------------|------------------------------------------|-----------------------------------------------------------|
| HMA7n          | 50.0                                        | 9.86                                       | 0                                         | 0.789     | 9.86                                         |                       |                                          |                                                           |
|                | 49.8                                        | 9.81                                       | 3.98                                      | 0.627     | 7.84                                         | 0.50                  | 1.5                                      |                                                           |
|                | 49.5                                        | 9.76                                       | 7.92                                      | 0.527     | 6.58                                         | 0.40                  | 1.3                                      |                                                           |
|                | 49.3                                        | 9.71                                       | 11.8                                      | 0.455     | 5.69                                         | 0.34                  | 1.3                                      |                                                           |
|                | 49.0                                        | 9.67                                       | 15.7                                      | 0.391     | 4.88                                         | 0.30                  | 1.4                                      |                                                           |
|                | 48.8                                        | 9.62                                       | 19.5                                      | 0.344     | 4.31                                         | 0.27                  | 1.4                                      |                                                           |
|                | 48.5                                        | 9.57                                       | 23.3                                      | 0.297     | 3.71                                         | 0.25                  | 1.5                                      |                                                           |
|                | 48.3                                        | 9.53                                       | 27.1                                      | 0.269     | 3.36                                         | 0.23                  | 1.5                                      |                                                           |
|                | 100                                         | 9.61                                       | 0.00                                      | 0.769     | 9.61                                         |                       |                                          |                                                           |
|                | 100                                         | 9.61                                       | 3.90                                      | 0.718     | 8.98                                         | 0.16                  | 1.5                                      |                                                           |
| 100            | 9.61                                        | 6.50                                       | 0.687                                     | 8.58      | 0.16                                         | 1.5                   |                                          |                                                           |
| 100            | 9.61                                        | 9.30                                       | 0.652                                     | 8.15      | 0.16                                         | 1.6                   |                                          |                                                           |
| 100            | 9.61                                        | 13.3                                       | 0.615                                     | 7.69      | 0.14                                         | 1.6                   |                                          |                                                           |
| 100            | 9.61                                        | 16.6                                       | 0.582                                     | 7.27      | 0.14                                         | 1.6                   |                                          |                                                           |
| 100            | 9.61                                        | 20.7                                       | 0.549                                     | 6.86      | 0.13                                         | 1.7                   |                                          |                                                           |
| 100            | 9.61                                        | 25.9                                       | 0.521                                     | 6.51      | 0.12                                         | 1.6                   |                                          |                                                           |
| 100            | 9.61                                        | 28.8                                       | 0.513                                     | 6.41      | 0.11                                         | 1.5                   |                                          |                                                           |
| 100            | 9.61                                        | 32.0                                       | 0.505                                     | 6.31      | 0.10                                         | 1.4                   |                                          |                                                           |
| average        |                                             |                                            |                                           |           |                                              |                       | <b>1.5(1)</b>                            | <b>5.8(4)</b>                                             |

<sup>a</sup> The experiments were carried out in Mops buffer (50 mM; pH 7.3; NaCl 100 mM) under anaerobic conditions. The reported values were confirmed with three independent protein samples;

<sup>b</sup> Zn occupancy on Egta;

<sup>c</sup> From Eq 5 where  $K_{\text{D}(\text{Zn-Egta})} = 1.0 \times 10^{-9}$  M and  $K_{\text{ex3}} \sim 8.9 \times 10^{-4}$  (see Table S2) at pH 7.3, NaCl 100 mM.

**Table S5. Estimation of  $K_{ex7}$  for competition reaction 7 and of  $K_{D(CuP)}$  from Eq 8<sup>a</sup>**

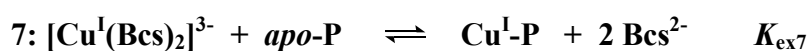

| Protein<br>(P) | [Bcs] <sub>total</sub><br>(μM) | [Cu <sup>I</sup> ] <sub>total</sub><br>(μM) | [P] <sub>total</sub><br>(μM) | A <sub>483</sub> | [Cu(Bcs) <sub>2</sub> ] <sup>3-</sup><br>(μM) | [Cu <sup>I</sup> P]<br>(μM) | Θ <sup>b</sup> | K <sub>D(CuP)</sub> <sup>c</sup><br>(M) |
|----------------|--------------------------------|---------------------------------------------|------------------------------|------------------|-----------------------------------------------|-----------------------------|----------------|-----------------------------------------|
| HMA4n          | 200                            | 35.0                                        | 3.6                          | 0.4321           | 33.2                                          | 1.8                         | 0.49           | 3.1 x 10 <sup>-17</sup>                 |
|                | 200                            | 35.0                                        | 7.20                         | 0.413            | 31.8                                          | 3.2                         | 0.45           | 3.3 x 10 <sup>-17</sup>                 |
|                | 200                            | 35.0                                        | 10.8                         | 0.392            | 30.2                                          | 4.9                         | 0.45           | 3.0 x 10 <sup>-17</sup>                 |
|                | 200                            | 35.0                                        | 16.1                         | 0.362            | 27.8                                          | 7.2                         | 0.44           | 2.7 x 10 <sup>-17</sup>                 |
|                | 200                            | 35.0                                        | 20.0                         | 0.342            | 26.3                                          | 8.7                         | 0.43           | 2.5 x 10 <sup>-17</sup>                 |
| average        |                                |                                             |                              |                  |                                               |                             |                | <b>2.9(3) x 10<sup>-17</sup></b>        |
| HMA7n          | 500                            | 32.2                                        | 15.8                         | 0.255            | 19.6                                          | 12.6                        | 0.80           | 3.7 x 10 <sup>-19</sup>                 |
|                | 500                            | 32.2                                        | 23.7                         | 0.206            | 15.8                                          | 16.4                        | 0.69           | 5.1 x 10 <sup>-19</sup>                 |
|                | 500                            | 32.2                                        | 31.4                         | 0.174            | 13.4                                          | 18.8                        | 0.60           | 6.3 x 10 <sup>-19</sup>                 |
|                | 500                            | 32.2                                        | 39.0                         | 0.145            | 11.2                                          | 21.1                        | 0.54           | 6.6 x 10 <sup>-19</sup>                 |
|                | 500                            | 32.2                                        | 46.6                         | 0.124            | 9.5                                           | 22.7                        | 0.49           | 6.9 x 10 <sup>-19</sup>                 |
|                | 500                            | 32.2                                        | 54.1                         | 0.118            | 9.1                                           | 23.1                        | 0.43           | 8.3 x 10 <sup>-19</sup>                 |
|                | 500                            | 32.2                                        | 61.5                         | 0.098            | 7.5                                           | 24.7                        | 0.40           | 7.6 x 10 <sup>-19</sup>                 |
|                | 500                            | 32.2                                        | 68.9                         | 0.088            | 6.8                                           | 25.4                        | 0.37           | 7.7 x 10 <sup>-19</sup>                 |
| average        |                                |                                             |                              |                  |                                               |                             |                | <b>6.5(1.5) x 10<sup>-19</sup></b>      |

<sup>a</sup> In Mops buffer (50 mM, pH 7.3; NaCl 100 mM) under anaerobic conditions. The reported are representative values and were confirmed with three independent protein sample preparations.

<sup>b</sup> Occupancy of Cu<sup>I</sup> on the protein.

<sup>c</sup> From Eq 8 where β<sub>2</sub> = 10<sup>19.8</sup> M<sup>-2</sup>.

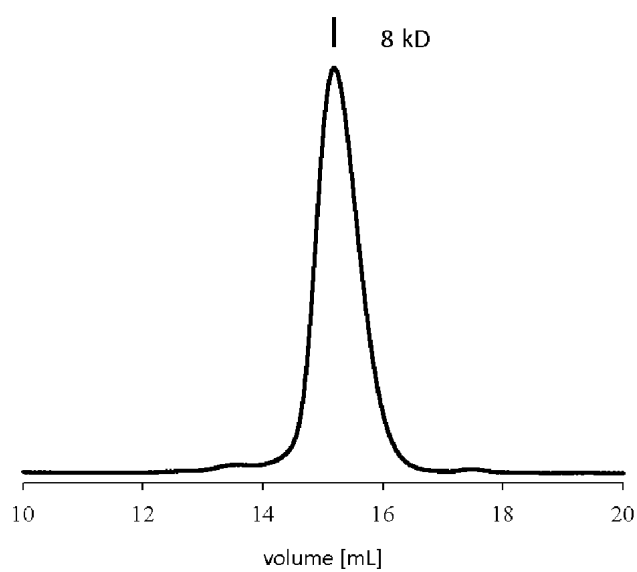

**Figure S1.** Analytical gel filtration elution profile of Zn-HMA7n on a Superdex-75 gel filtration column (HR10/30; Pharmacia) in Mops buffer (20 mM, pH 7.3, 100 mM NaCl) at a flow rate of 0.7 mL/min.
